# Supplementary material
Source: PubMed Central journal article supplement (PMC3241959)
Supplement: NIHMS340788-supplement-Supplementary_data.pdf [file NIHMS340788-supplement-Supplementary_data.pdf]

**Supplementary information**

**Supplementary methods:**

*Immunofluorescence:*

Immunofluorescence was performed as described previously (11). Primary antibodies were as follows: an anti-ENH1 monoclonal antibody (Abnova), anti- $\alpha$ 1C polyclonal (Alomone labs). The fluorescence of cells was observed using a confocal LSM5 microscope (Carl Zeiss).

*Cloning of the C-terminal domain of  $\alpha$ 1C.*

The C-terminal domain of  $\alpha$ 1C was subcloned from the complete coding sequence of the rabbit cardiac dihydropyridine-sensitive calcium channel (kindly provided by Professor Birnbaumer (National Institutes of Health, Research Triangle Park, North Carolina, USA). To create a construct encoding a C-terminal His fusion protein (1509 to 2170, amino acid counting), we designed two primers: 5'- TAC AAG CTT CCA TGG ACAACT TTG ACT AC CT -3' and 5'- GCT CTA GAC AGG CTG CTG ACG CCG GCC CT-3' and use them for PCR amplification with Pfx polymerase (Invitrogen). The amplicon was digested with HindIII and XbaI (underlined) and cloned into a pcDNA4 vector (Invitrogen). The construct was sequenced.

*In-vitro phosphorylation assay.*

In-vitro phosphorylation of the C-terminal domain of  $\alpha 1C$  was performed as described previously (11, 15). Briefly, the C-terminal domain of  $\alpha 1C$  was immunoprecipitation from Hek cells extract. For the phosphorylation assay the beads were mixed with 25  $\mu$ l of the reaction mixture containing 20 mM Tris, pH 7.5, 10 mM  $MgCl_2$ , 20  $\mu$ M ATP, 20 KBq [ $\gamma$ - $^{32}P$ ] ATP (about 220 TBq/mmol), and 10 ng recombinant constitutive active PKD1(Calbiochem), and incubated at 30 °C for 20 min. After the reaction was terminated by addition of an SDS-sample buffer, the beads were analyzed by SDS-PAGE (sodium dodecyl sulfate-polyacrylamide gel electrophoresis) and subsequent autoradiography using a Phosphor Imaging System Cyclone (Packard).

### **Supplementary figures legends**

Figure S1: *Colocalisation of ENH1 and  $\alpha 1C$  in neonatal rat cardiomyocytes.*

Images are immunofluorescence of control and PE-stimulated neonatal rat cardiomyocytes. Cells were co-stained for L-type voltage-gated  $Ca^{2+}$  channel using a polyclonal anti- $\alpha 1C$  and for ENH1 using a monoclonal anti-ENH1. Images were merged to show co-localization. Scale bare represents 10  $\mu$ m.

Figure S2: *Inhibition of the PE-induce increase of L-type calcium currents with protein kinase C inhibitors.*

L-type calcium currents were measured in neonatal rat cardiomyocytes by the patch-clamp. Mean current density-voltage relationship of L-type calcium current measured

before and after the addition of 20  $\mu$ M PE in presence of PKC specific inhibitors, 2  $\mu$ M Chelerythrine (upper graph) or 2  $\mu$ M GF109203X (lower graph).

Figures S3: *PKD1 phosphorylates in-vitro the C-terminal domain of the  $\alpha$ 1C subunit of the L-type voltage-gated  $Ca^{2+}$  channel.* In-vitro phosphorylation assay was performed using the immunoprecipitated myc-tagged C-terminal domain of the  $\alpha$ 1C subunit using an anti-myc specific antibody. Autoradiography shows the phosphorylation level of the C-terminal domain by recombinant constitutive active PKD1 (Active-PKD1, left) and wild-type non active PKD1 (Inactive-PKD1, right) were used for in-vitro phosphorylation. Immunoblots show the immunoprecipitated myc-tagged C-terminal domain of the  $\alpha$ 1C to confirm the expression. In-vitro phosphorylation assay was performed 3 times independently.

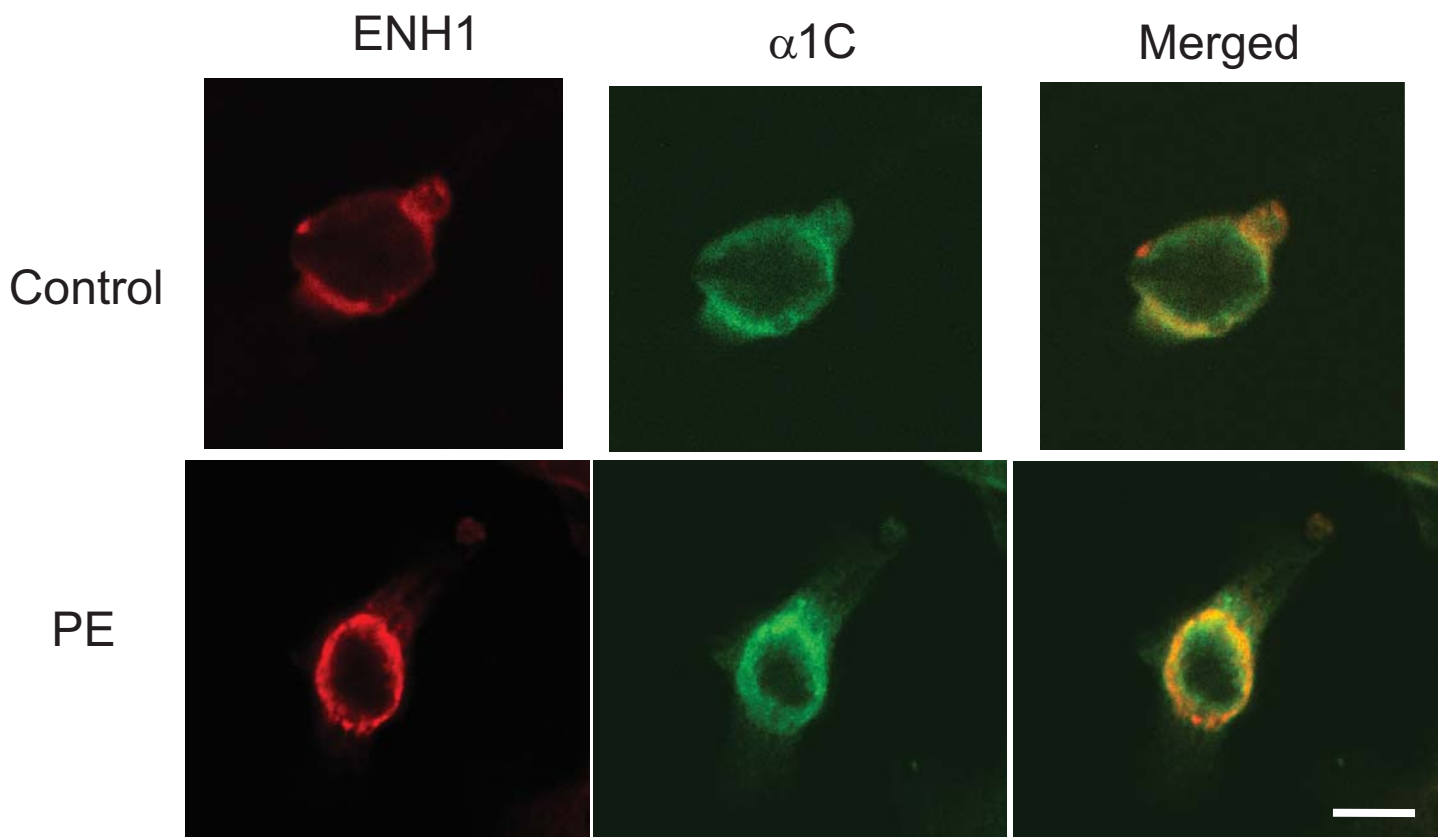

Chelerythrine  
2 $\mu$ M

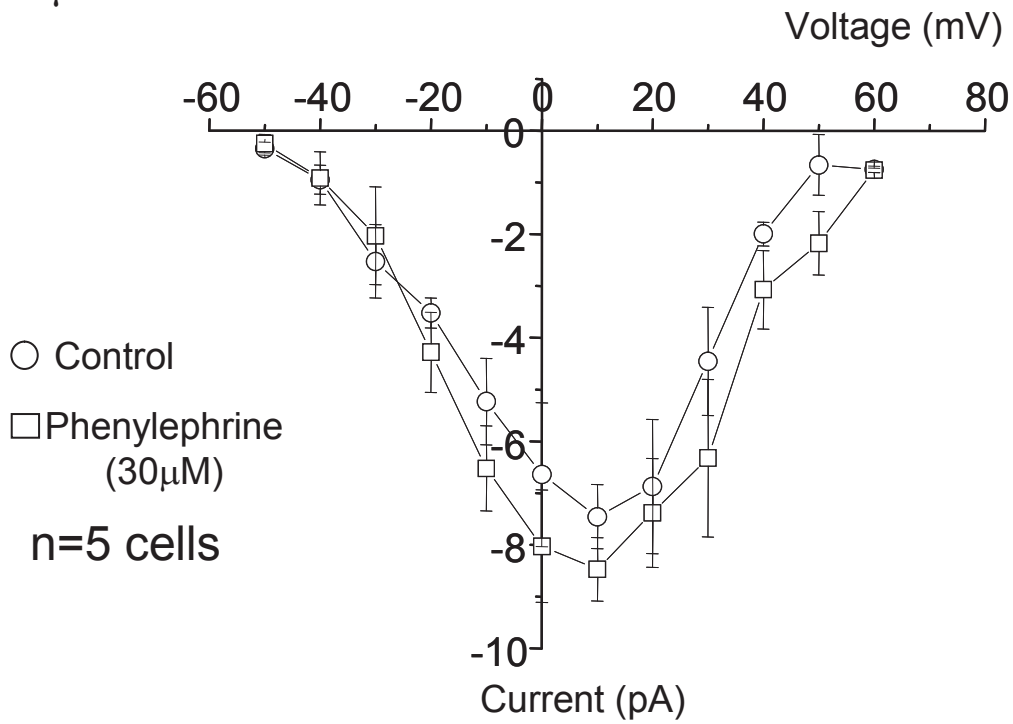

GF109203X  
2 $\mu$ M

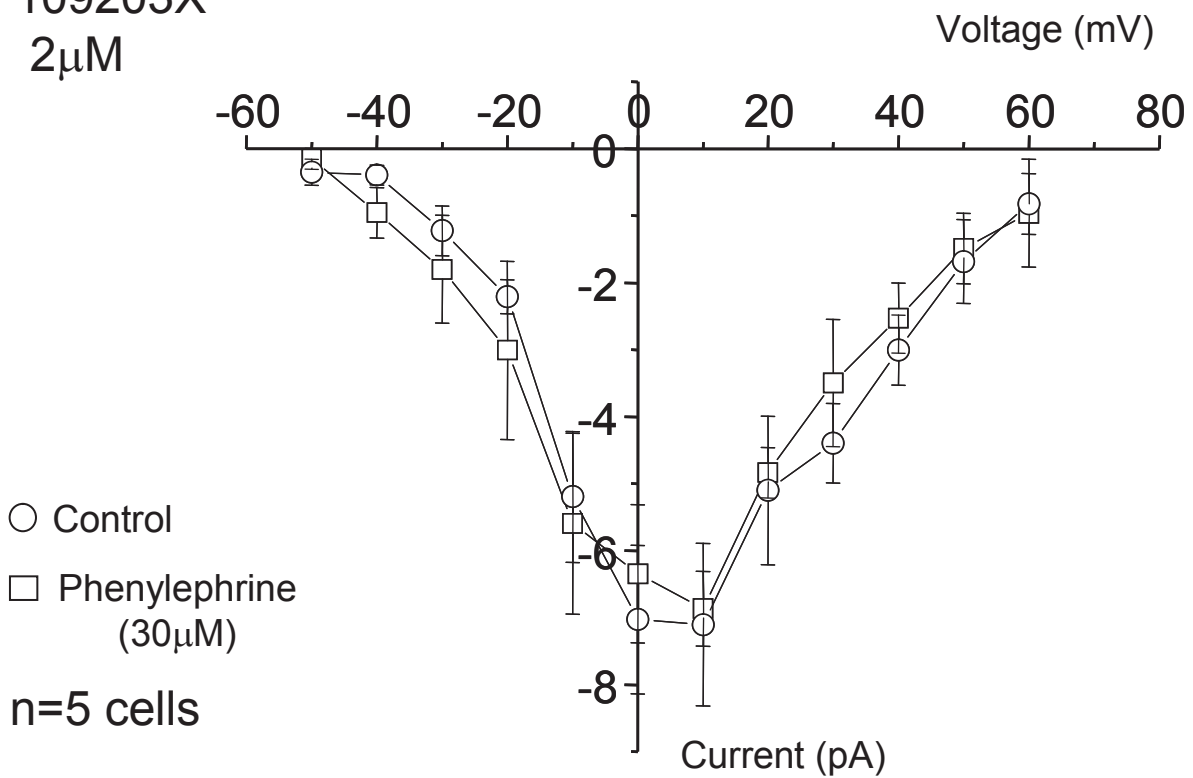

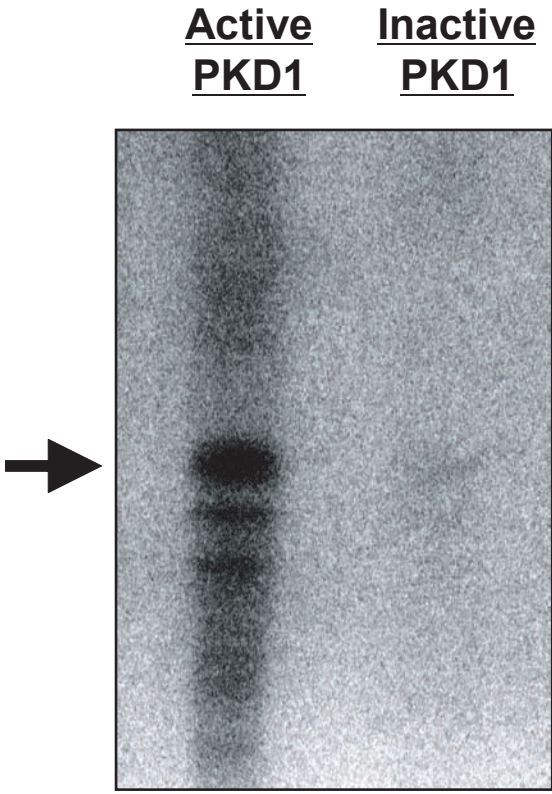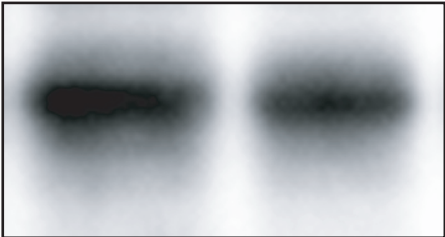

IP: anti-myc  
WB anti-myc
